# Supplementary material for: Prediction of Homologous Recombination Deficiency from Oncomine Comprehensive Assay Plus Correlating with SOPHiA DDM HRD Solution
Source: medRxiv preprint, doi:10.1101/2023.08.09.23293743, version 1 (2023-08-15)
Supplement: Supplemental Figure Legends [file 293743_file08.docx]

Supplemental Figure 1. Flowchart of the study.

Supplemental Figure 2. Hyperparameter tuning and performance assessment in repeated 5-fold cross-validation on a grid of hyper-parameters. The x-axis is a penalty scaling parameter: (, , , , , ), color is mixture hyperparameter of penalty function: (0.0, 0.25, 0.5, 0.75, 1.0). CCC: concordance correlation coefficient, RMSE: root mean squared error
